# Supplementary material for: Protective effects and mechanism of coenzyme Q10 and vitamin C on doxorubicin-induced gastric mucosal injury and effects of intestinal flora
Source: PubMed Central journal article supplement — Korean J Physiol Pharmacol. 2021 Jul 1;25(4):261–72. doi: 10.4196/kjpp.2021.25.4.261 (PMC8255120; doi:10.4196/kjpp.2021.25.4.261), 2021-07-01
Supplement: kjpp-25-4-261-supple.pdf [file kjpp-25-4-261-supple.pdf]

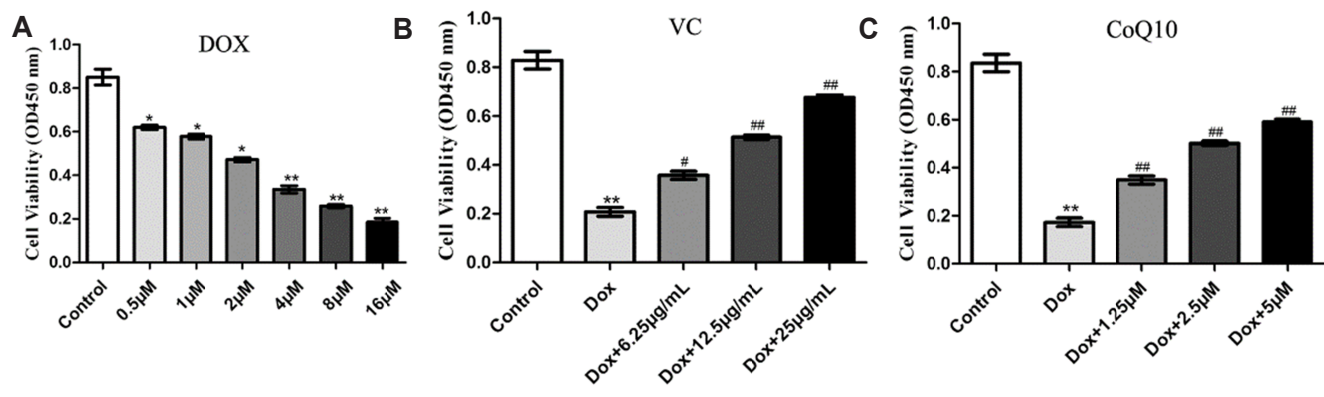

**Supplementary Fig. 1. Effects of Dox, VC and CoQ10 on the viability of GES-1 cells.** Dox, doxorubicin; CoQ10, coenzyme Q10; VC, vitamin C. \* $p < 0.05$  (vs. control), \*\* $p < 0.01$  (vs. control), # $p < 0.05$  (vs. Dox); and ## $p < 0.01$  (vs. Dox).

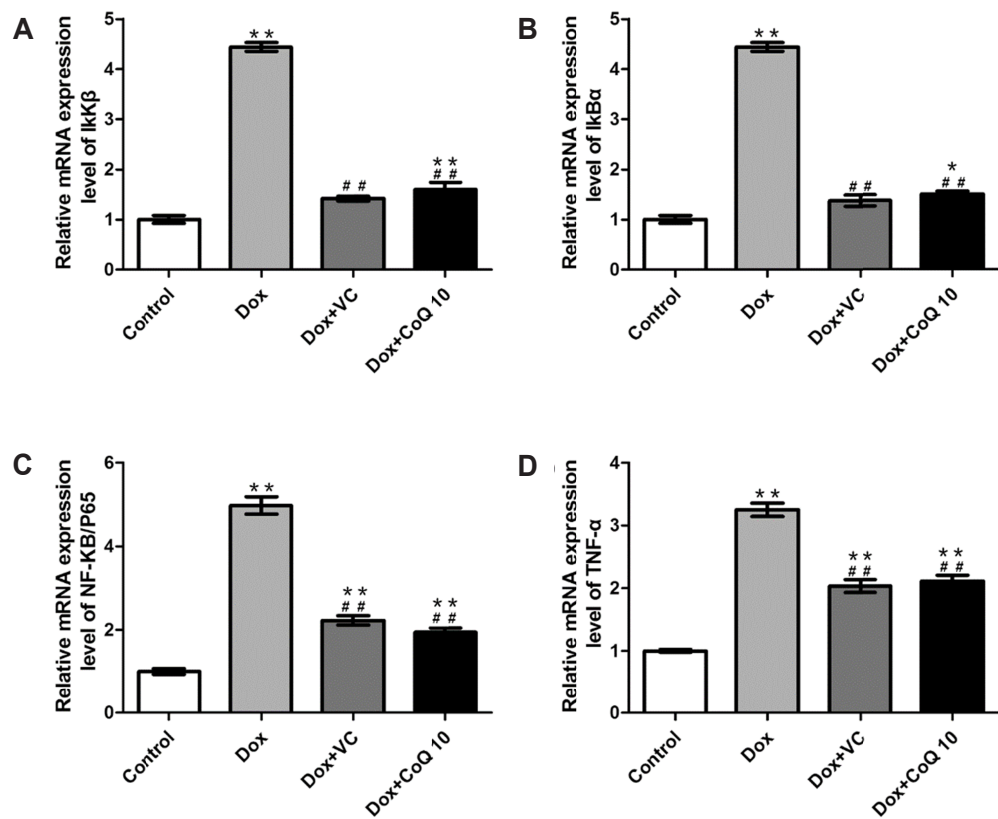

**Supplementary Fig. 2. Effects of Dox, VC and CoQ10 on the expression of  $I\kappa K\beta$ ,  $I\kappa B\alpha$ , NF- $\kappa$ B/p65 and TNF- $\alpha$  mRNA levels in GES-1 cells.** Dox, doxorubicin; CoQ10, coenzyme Q10; VC, vitamin C. \* $p < 0.05$  (vs. control); \*\* $p < 0.01$  (vs. control); and ## $p < 0.01$  (vs. Dox).

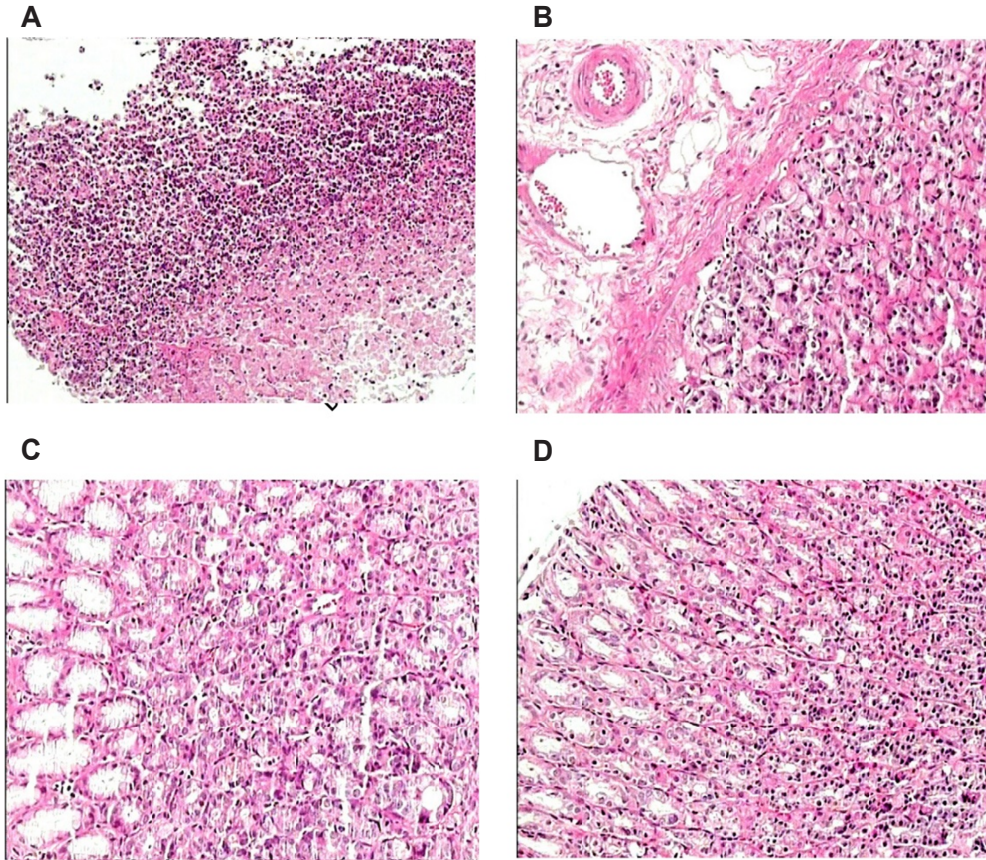

**Supplementary Fig. 3. H&E stain (A: Dox, B: Control, C: Dox + CoQ, D: Dox + Vc) ( $\times 100$  magnification).** Dox, doxorubicin; CoQ10, coenzyme Q10; VC, vitamin C.
